# Supplementary material
Source: publisher figshare collection journal article supplement (https://springernature.figshare.com/ndownloader/files/17198246)
Supplement: Supplementary file [file 17198246]

Supplementary information of  
**BERMUDA: a novel deep transfer learning method for single-cell RNA sequencing**  
**batch correction reveals hidden high-resolution cellular subtypes**

**Supplementary figures**

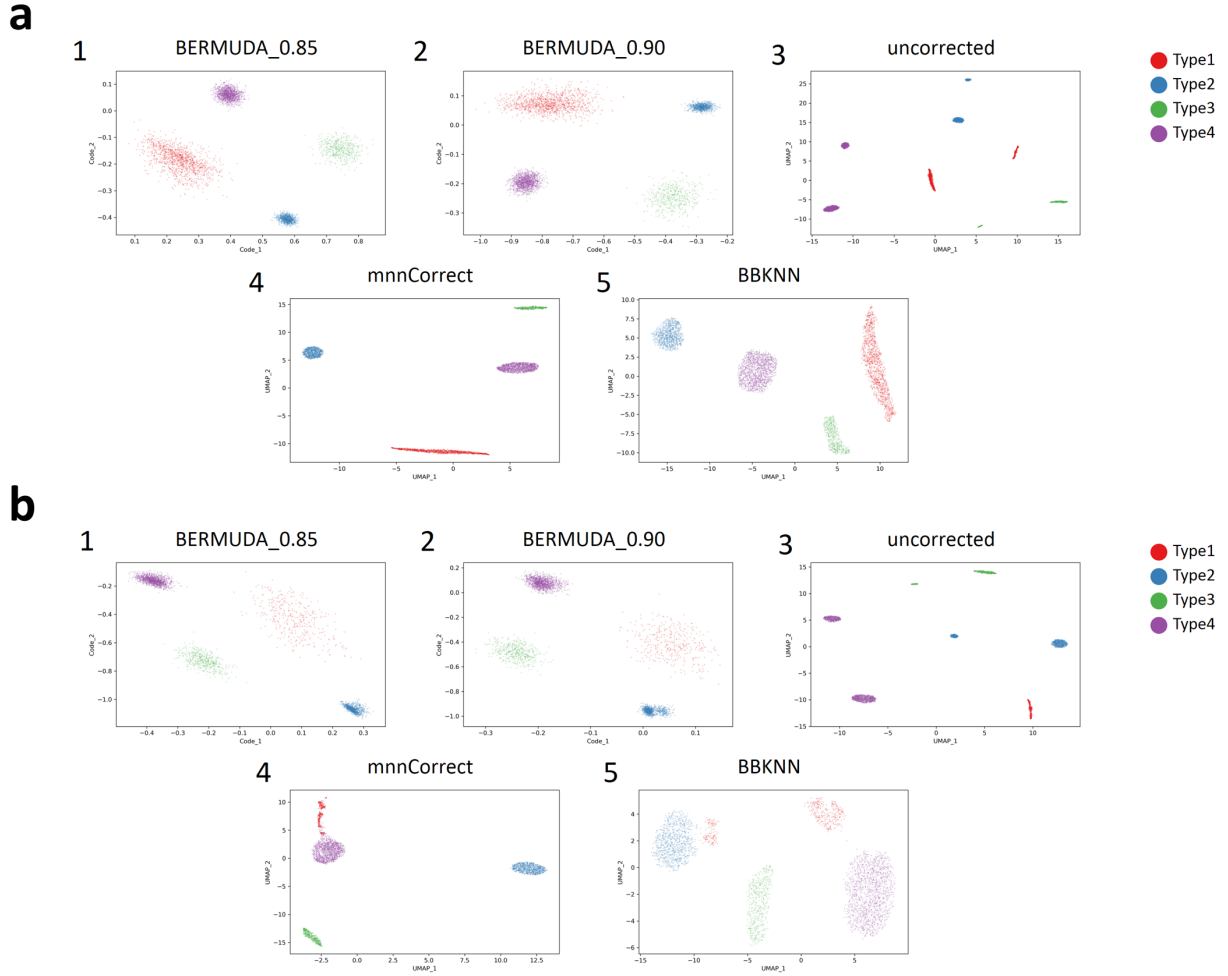

**Figure S1. Removing batch effects in simulated data generated by 2-dimensional Gaussian distribution.** Visualizations of results for simulated data generated by 2-dimensional Gaussian distribution. Results of our method are visualized by the 2-dimensional code in the trained autoencoder, while results of other methods are visualized using UMAP. BERMUDA\_0.85 and BERMUDA\_0.90 represent our method with  $S_{thr} = 0.85$  and  $0.90$  respectively. a. Results of *Experiment all*. b. Results of *Experiment removal1*.

**a**

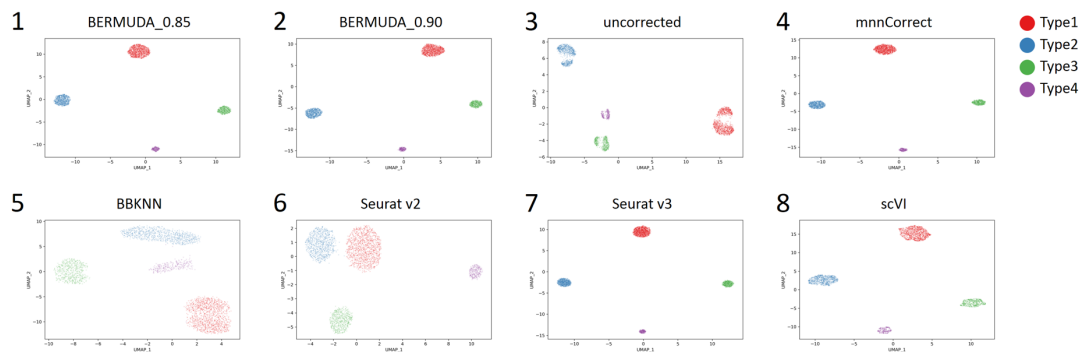

**b**

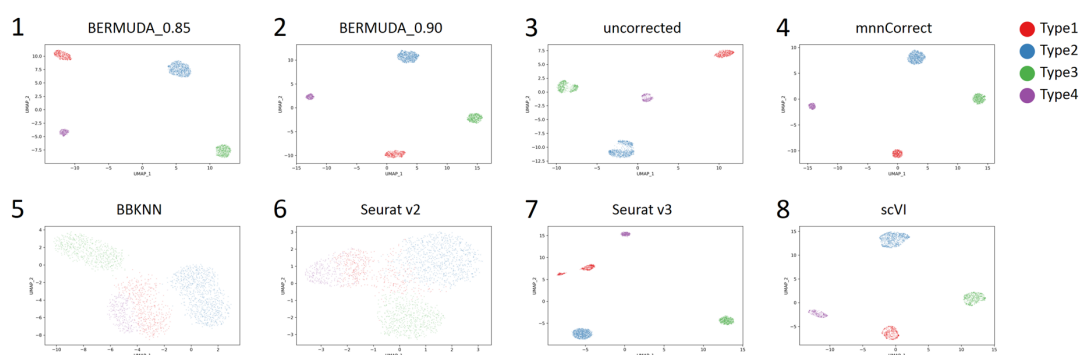

**c**

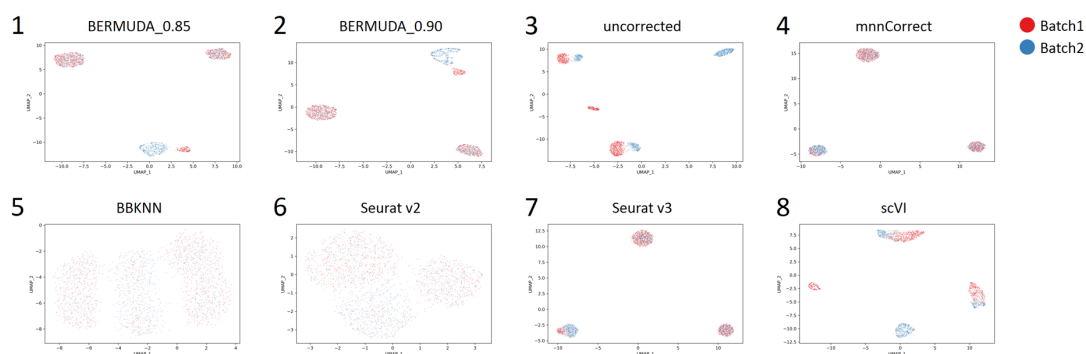

**d**

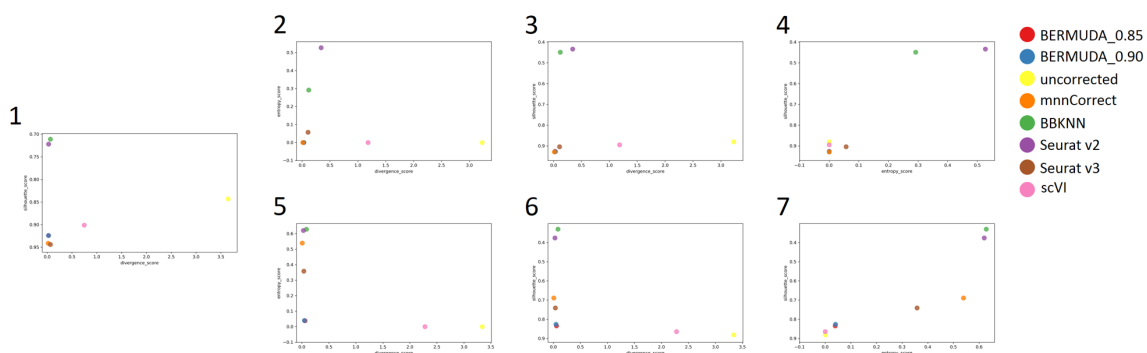

**Figure S2. Removing batch effects in simulated data generated by Splatter.** a. UMAP visualizations of results for *Experiment all* colored by cell types. b. UMAP visualizations of results for *Experiment removal1* colored by cell types. c. UMAP visualizations of results for *Experiment removal2* colored by batches. d. Evaluation of batch correction performance on Splatter dataset using the proposed metrics. The *silhouette\_score* axis is reversed so that points close to the bottom-left corner indicate better results. c1. *Experiment all*. c2-4. *Experiment removal1*. c5-7. *Experiment removal2*.

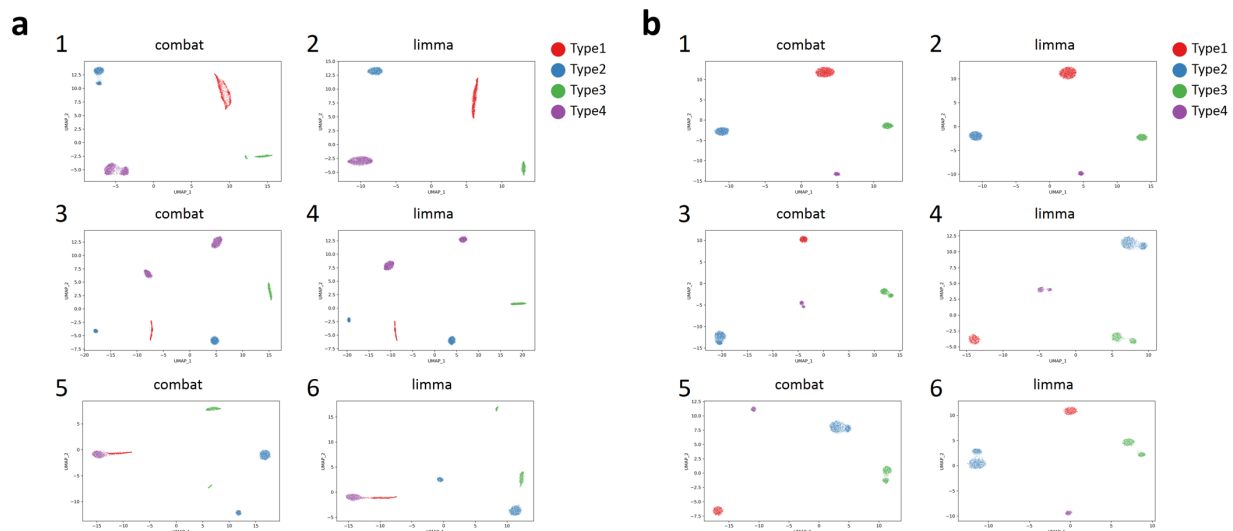

**Figure S3. *Combat* and *limma* fail to correctly remove batch effects in simulated datasets.** *Combat* and *limma* could not remove batch effects in scRNA-seq data correctly when not all cellular states were shared by all the batches (*Experiment removal1* and *Experiment removal2*). a. UMAP visualizations of batch correction results for simulated data generated by 2-dimensional Gaussian distribution. a1-2. *Experiment all*. a3-4. *Experiment removal1*. a5-6. *Experiment removal2*. b. UMAP visualizations of batch correction results for simulated data generated by Splatter. b1-2. *Experiment all*. b3-4. *Experiment removal1*. b5-6. *Experiment removal2*.

**a**

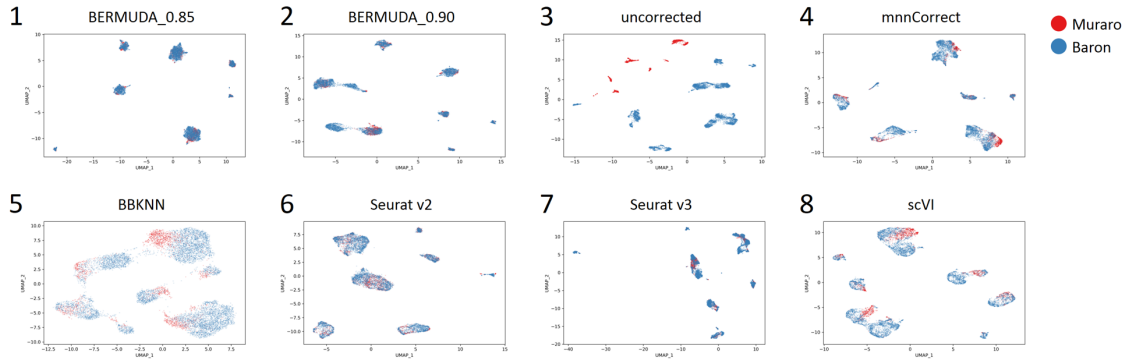

**b**

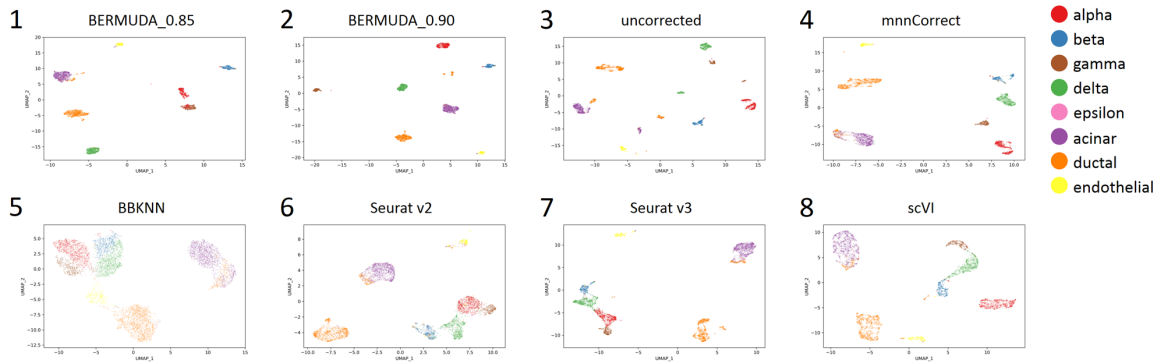

**c**

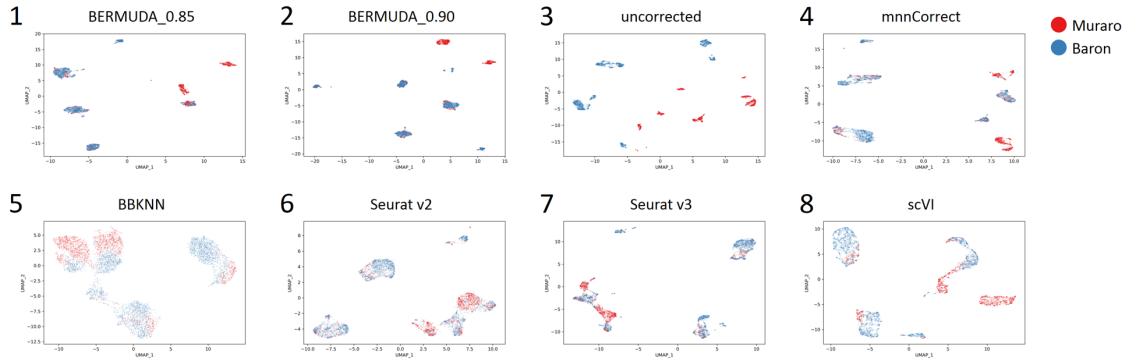

**d**

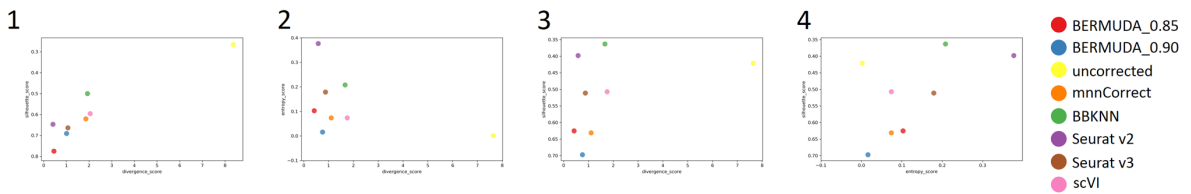

**Figure S4. Removing batch effects in scRNA-seq data of pancreas cells with *Muraro batch* and *Baron batch*.** a. UMAP visualizations of results for *Experiment all* colored by batches. b. UMAP visualizations of results for *Experiment removal* colored by cell types. c. UMAP visualizations of results in

*Experiment removal* colored by batches. d. Evaluation of batch correction performance on *Experiment removal* using the proposed metrics. The *silhouette\_score* axis is reversed so that points close to the bottom-left corner indicate better results. d1. *Experiment all*. d2-4. *Experiment removal*.

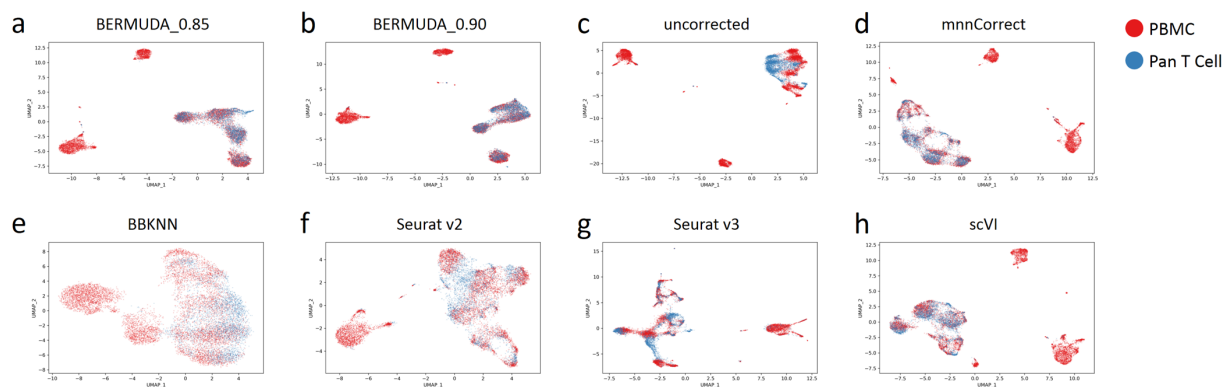

**Figure S5. Removing batch effects in scRNA-seq data of PBMCs.** UMAP visualizations of results on PBMC dataset colored by batches. Our method correctly merged T cells from the both batches, while preserved the structures of cell clusters specific to the *PBMC* batch.

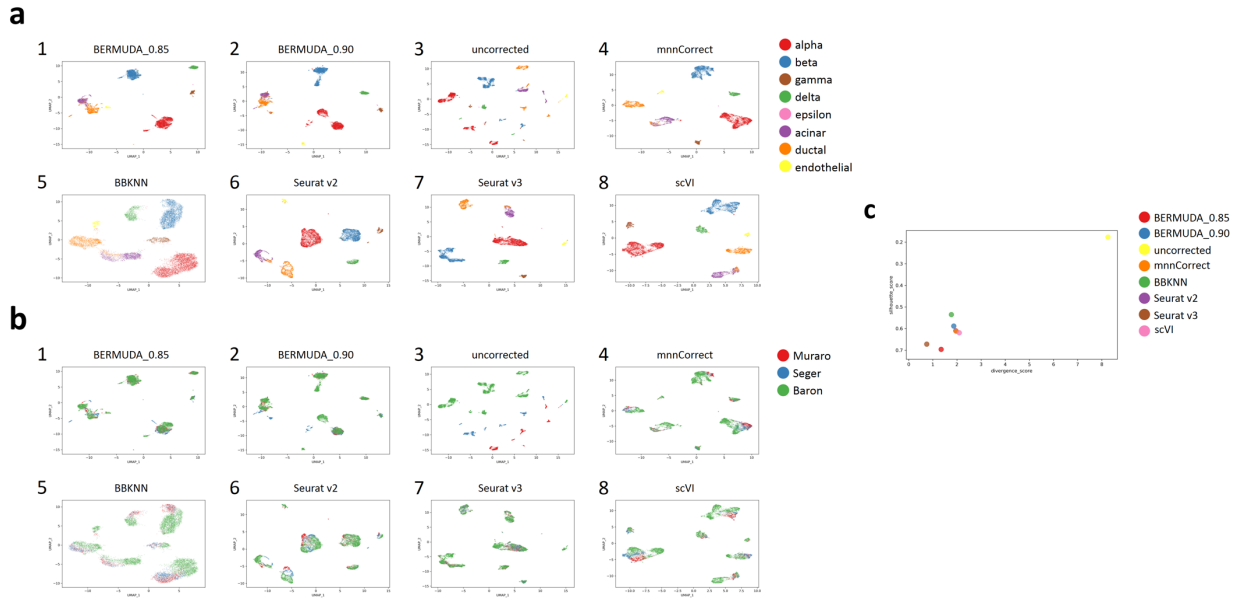

**Figure S6. Removing batch effects in scRNA-seq data of pancreas cells with multiple batches.** All the cells from *Muraro batch*, *Baron batch*, and *Segerstolpe batch* were used for analysis. a. UMAP visualizations of results for *Experiment all* colored by cell types. b. UMAP visualizations of results for *Experiment all* colored by batches. c. Evaluation of batch correction performance on *Experiment all* using the proposed metrics.



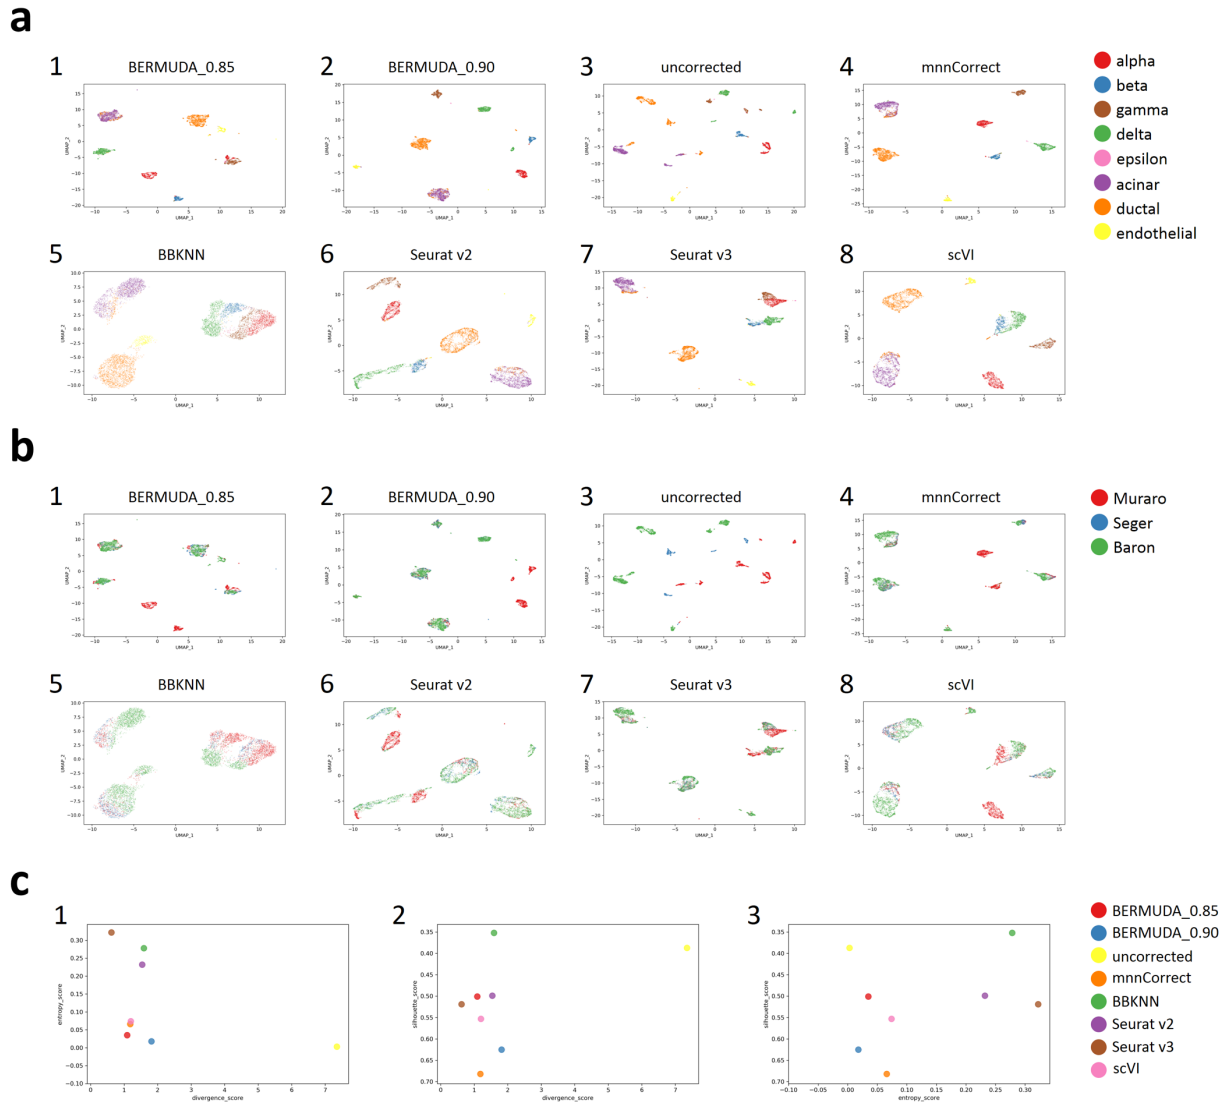

**Figure S7. Removing batch effects in scRNA-seq data of pancreas cells with multiple batches of different cell population compositions.** Alpha and beta cells from *Baron batch* and *Segerstolpe batch* were removed from analysis. a. UMAP visualizations of results for *Experiment removal* colored by cell types. b. UMAP visualization of results for *Experiment removal* colored by batches. c. Evaluation of batch correction performance on *Experiment removal* using the proposed metrics.

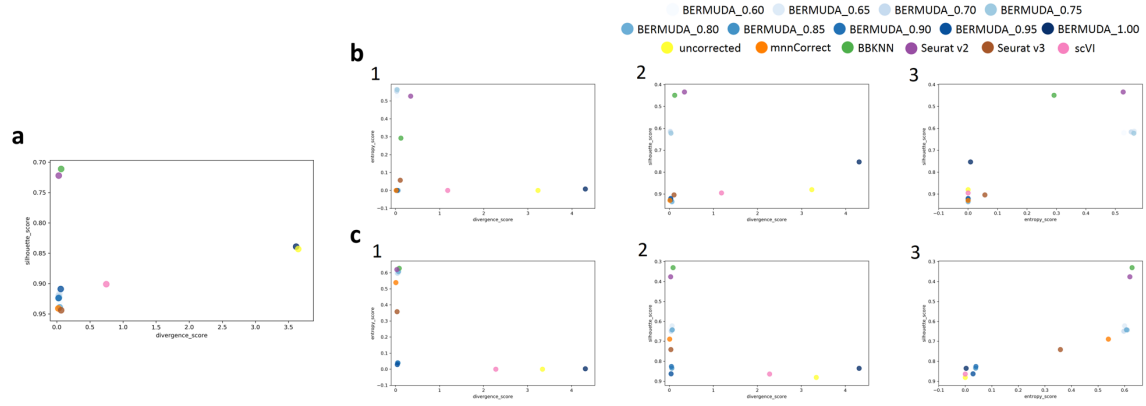

**Figure S8. Results of Splatter dataset using different  $S_{thr}$  values evaluated by proposed metrics. a. Experiment all. b. Experiment removal1. c. Experiment removal2.** The most important parameter in our method is  $S_{thr}$ , which is the threshold applied on the cluster similarity score to identify similar clusters across different batches.  $S_{thr}$  can affect the results of batch correction, where a lower  $S_{thr}$  value can produce a more homogeneous mixture of different batches within cell types and a higher  $S_{thr}$  value can help to retain more batch-specific biological signals. We experimentally demonstrate our choice of  $S_{thr}$  by evaluating the performance of our method using  $S_{thr}$  ranges from 0.60 to 1.00. Our method consistently outperformed the existing methods on the Splatter dataset when choosing  $S_{thr}$  between 0.85 and 0.90. More specifically, when all the cell types were shared in different batches, generally  $S_{thr} \leq 0.9$  produced competitive results, since we did not need to consider the case where different cell types might be mixed together by using a low threshold. However, when we introduced large differences in cell population compositions by removing cell types from specific batches, we observed that  $S_{thr}$  between 0.85 and 0.90 consistently produced best results across different experiments, and we used  $S_{thr}$  between 0.85 and 0.90 as a default parameter choice for *BERMUDA*.

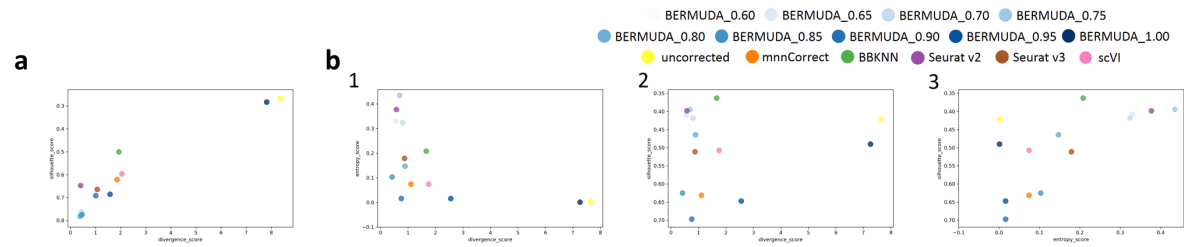

**Figure S9. Results of pancreas dataset with *Muraro batch* and *Baron batch* using different  $S_{thr}$  values evaluated by proposed metrics. a. *Experiment all*. b. *Experiment removal*. Our method consistently outperformed existing methods on the pancreas dataset when choosing  $S_{thr}$  between 0.85 and 0.90.**

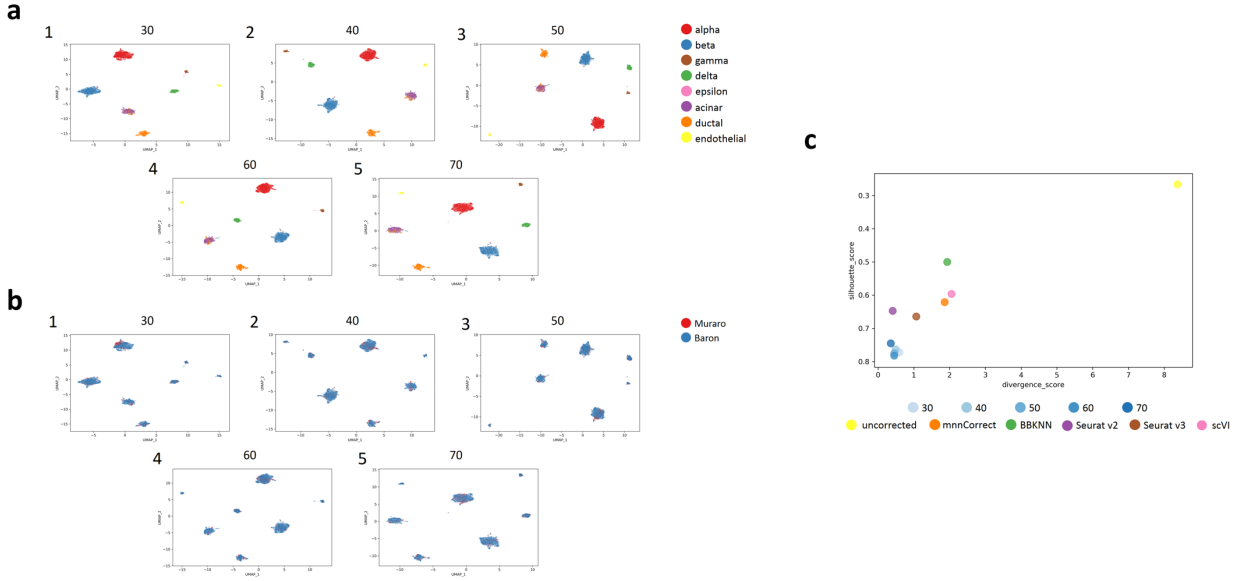

**Figure S10. *BERMUDA* is robust to the number of cells sampled from each cluster in a mini-batch.** The number of cells sampled from each cluster in a mini-batch,  $n_{mb}$ , is a hyperparameter in *BERMUDA*. We experimentally demonstrate that *BERMUDA* is robust to the choice of  $n_{mb}$  by evaluating the performance of *BERMUDA* using  $n_{mb}$  ranges from 30 to 70. The results were generated by performing *Experiment all* to combine *Muraro batch* and *Baron batch* in the pancreas dataset with  $S_{thr} = 0.85$ . We observed that the performance of *BERMUDA* was insensitive to the choice of  $n_{mb}$  and *BERMUDA* consistently outperformed existing methods under a wide range of  $n_{mb}$  values. a. UMAP visualizations of results colored by cell types. The number above each figure represents the value of  $n_{mb}$  used for training *BERMUDA*. b. UMAP visualizations of results colored by batches. c. Evaluation of batch correction performance using the proposed metrics.

## Supplementary tables

**Table S1.** List of differently expressed genes within alpha cells in the pancreas dataset.

| Gene Symbol | Adjusted p-value<br>(Muraro vs. Baron) | Adjusted p-value<br>(Baron vs. Baron) |
|-------------|----------------------------------------|---------------------------------------|
| PCSK1N      | 0.00E+00                               | 7.97E-55                              |
| FAP         | 0.00E+00                               | 6.04E-76                              |
| G6PC2       | 7.31E-290                              | 3.54E-168                             |
| SLC30A8     | 5.80E-281                              | 2.75E-162                             |
| SLC38A4     | 1.53E-277                              | 7.67E-51                              |
| ARRDC4      | 5.64E-249                              | 1.88E-60                              |
| ABCC8       | 6.70E-241                              | 2.05E-130                             |
| TM4SF4      | 1.06E-173                              | 8.14E-221                             |
| CRYBA2      | 1.00E-169                              | 1.86E-202                             |
| <b>MAFB</b> | <b>1.42E-158</b>                       | <b>4.16E-109</b>                      |
| <b>ARX</b>  | <b>1.09E-145</b>                       | <b>3.21E-60</b>                       |
| TXNIP       | 4.58E-104                              | 6.57E-122                             |
| INSIG1      | 9.34E-95                               | 9.48E-53                              |
| FXYP6       | 1.41E-93                               | 6.77E-119                             |
| XIST        | 6.48E-85                               | 1.19E-169                             |
| SERPINA1    | 1.62E-76                               | 3.09E-52                              |
| S100A11     | 7.41E-74                               | 7.02E-87                              |
| TNFRSF12A   | 1.38E-69                               | 6.32E-94                              |
| ANXA2       | 1.06E-64                               | 1.45E-111                             |

Only genes with adjusted p-value  $\leq 10^{-50}$  in both tests are reported. The bold genes are discussed in detail in the paper.

**Table S2.** List of differently expressed genes within beta cells in the pancreas dataset.

| Gene Symbol | Adjusted p-value<br>(Muraro vs. Baron) | Adjusted p-value<br>(Baron vs. Baron) |
|-------------|----------------------------------------|---------------------------------------|
| SYT13       | 6.98E-194                              | 2.14E-84                              |
| SLC30A8     | 1.34E-179                              | 2.47E-223                             |
| ABCC8       | 2.05E-170                              | 1.95E-162                             |
| G6PC2       | 3.16E-162                              | 5.89E-155                             |
| INS         | 3.93E-160                              | 5.62E-83                              |
| <b>PDX1</b> | <b>1.35E-151</b>                       | <b>8.21E-51</b>                       |
| <b>MAFB</b> | <b>1.06E-150</b>                       | <b>6.35E-95</b>                       |
| <b>MAFA</b> | <b>9.22E-135</b>                       | <b>2.77E-54</b>                       |
| PLCXD3      | 7.72E-126                              | 1.97E-62                              |
| PCSK1       | 1.90E-97                               | 7.74E-96                              |
| WNT4        | 1.11E-81                               | 1.27E-61                              |
| TIMP2       | 4.85E-80                               | 1.90E-61                              |
| EDN3        | 5.89E-62                               | 4.68E-92                              |

Only genes with adjusted p-value  $\leq 10^{-50}$  in both tests are reported. The bold genes are discussed in detail in the paper.

**Table S3.** Running time of different methods in the pancreas dataset.

| Method                       | Running time(s) |
|------------------------------|-----------------|
| BERMUDA ( $S_{thr} = 0.85$ ) | 285.91          |
| BERMUDA ( $S_{thr} = 0.90$ ) | 262.98          |
| mnnCorrect                   | 35.90           |
| BBKNN                        | 5.02            |
| Seurat v2                    | 338.33          |
| Seurat v3                    | 75.27           |
| scVI                         | 360.33          |

The running time was measured by performing *Experiment all* on *Muraro batch* and *Baron batch*. Since we expect *BERMUDA* to be adopted by biologists who may not always have easy access to high-end computing facilities, and some of the methods compared do not have a GPU implementation, we evaluated the running time on a desktop computer with a CPU (2.7 GHz Intel Core i5) for fair comparison.
